# Supplementary material for: Common host variation drives malaria parasite fitness in healthy human red cells
Source: eLife. 2021 Sep 23;10:e69808. doi: 10.7554/eLife.69808 (PMC8497061; doi:10.7554/eLife.69808)
Supplement: Figure 4—source data 1. [file elife-69808-fig4-data1.xlsx]

## Sheet: 061520
	3D7 growth			Th.026 growth			3D7 invasion			Th.026 invasion
Predictor	Lasso CV Support (%)	OLS Effect Size	OLS p value	Lasso CV Support (%)	OLS Effect Size	OLS p value	Lasso CV Support (%)	OLS Effect Size	OLS p value	Lasso CV Support (%)	OLS Effect Size	OLS p value
MCV	99.91	1.70671	0.00128598	96.76	1.04635	0.000903176	2.21	-0.439811	0.392234	14.8	0.538529	0.594024
Osmo50	99.73	-2.38274	0.00533872	12.27	-0.682979	0.190385	12.95	-0.777516	0.304492	28.41	-2.28498	0.121677
DImax	99.12	261.494	0.000498734	75.84	120.857	0.00808314	1.45	22.8356	0.762175	2.34	253.644	0.0825067
Ohyper	96.54	0.587779	0.00313313	91.43	0.3192	0.00745217	87.01	0.49514	0.00784098	88.34	1.02018	0.00506949
Matrix_4	96.07	0.398957	0.0357749	8.6	0.105169	0.359663	5.62	0.308333	0.0974848	24.45	0.870875	0.0155417
HCT	91.64	0.720686	0.315086	0.4	0.00557029	0.989646	32.65	0.023766	0.971969	0.27	0.056683	0.96592
MPV	87.16	3.34217	0.162974	2.72	0.485978	0.735383	20.74	-0.623518	0.781139	3.63	-1.64728	0.708168
RBC	61.58	0.34799	0.949076	9.41	-1.99818	0.537802	4.82	0.696514	0.895132	50.99	7.00558	0.498244
Matrix_6	46.21	-99.6985	0.0813709	0.99	-30.7052	0.371937	6.42	-59.0043	0.229825	9.42	-136.997	0.154112
Age	40.21	0.276424	0.122147	45.55	0.177738	0.0949064	49.8	0.134887	0.404647	5.35	0.203458	0.522164
HDW	36.41	-5.66667	0.601973	0.59	-4.88307	0.45032	0.46	-7.58873	0.419366	10.34	-1.43752	0.93802
RDW	30.86	2.48578	0.499789	4.48	-2.68553	0.219434	73.93	-0.608132	0.857731	4.48	5.47085	0.409613
Matrix_7	23.85	-19.1233	0.351767	3.67	-14.7741	0.226411	3.48	16.8226	0.346394	10.46	-3.53239	0.920025
Omax	23.11	0.119682	0.662681	1.08	-0.0179353	0.91273	3.05	0.0395697	0.883359	6.97	0.11848	0.822768
PLT	20.89	-0.0452386	0.370584	0.99	-0.00829592	0.783542	91.54	-0.0628222	0.159645	5.74	-0.0170179	0.847333
Matrix_5	15.73	-0.380651	0.0428201	0.02	-0.0930577	0.412229	1.22	-0.304989	0.0962672	2.65	-0.848956	0.0167782
Matrix_8	15.14	-8.97075	0.224084	83.76	-12.0392	0.00504586	9.17	5.69994	0.388073	7.71	6.64331	0.60883
Sex	14.84	0.45184	0.918054	3.95	2.69843	0.300661	11.14	2.53657	0.522492	16.44	7.28672	0.34795
MCHC	12.86	-3.14085	0.224489	1.02	-1.2498	0.418882	80.54	-6.41545	0.00582138	4.34	-10.5217	0.0225236
Omin	12.07	-0.430025	0.32533	1.17	-0.113993	0.662748	3.04	-0.0434543	0.91609	11.65	0.104889	0.896837
DImin	10.08	389.901	0.0134754	1.46	51.8948	0.589386	7.21	139.145	0.330917	10.25	448.275	0.107679
CHCM	6.4	-5.17278	0.0240312	0.47	-1.54713	0.264449	91.96	-5.56849	0.00573225	91.01	-11.3706	0.00391672
HGB	3.81	0.650377	0.725105	0.37	-0.382005	0.728962	0.05	-1.38361	0.405063	9.71	-2.88884	0.375271
MCH	2.89	2.34752	0.0716967	4.84	1.84621	0.0164412	86.29	-2.4304	0.0530842	3.59	-1.95752	0.433518
DIhyper	1.93	467.312	0.00194568	0.7	221.561	0.0150703	4.29	44.1229	0.768629	23.8	526.46	0.069467
