# Supplementary material for: Common host variation drives malaria parasite fitness in healthy human red cells
Source: eLife. 2021 Sep 23;10:e69808. doi: 10.7554/eLife.69808 (PMC8497061; doi:10.7554/eLife.69808)
Supplement: Figure 5—source data 1. [file elife-69808-fig5-data1.xlsx]

## Sheet: Sheet1
Gene name	Reason for inclusion
ABCB6	Null allele associated with resistance to P. falciparum invasion (Egan et al., 2018)
ANK1	Allelic variants associated with hereditary elliptocytosis and spherocytosis, which protect from malaria (see text); experimental mutations protect against rodent malaria (Huang et al., 2017)
ATP2B4	Variant associated with severe malaria in large GWAS (MGE network, 2014)
BSG	Essential receptor for P falciparum invasion; allelic variant associated with reduced invasion (Crosnier et al., 2011)
CD44	Receptor for P falciparum invasion (Egan et al., 2015; Kanjee et al., 2017)
CD55	Essential receptor for P falciparum invasion; coding variants at higher frequency in malaria-endemic regions (Egan et al., 2015)
CR1	Direct interaction between PfEMP1 and CR1; some alleles reduce rosetting and coincide with endemicity in Africa; structural differences between humans and primates explained by positive selection (Krych-Goldberg et al., 2002)
EPB41	Allelic variants associated with hereditary elliptocytosis, which protects from malaria (see text); possible receptor for P. falciparum invasion (Lanzillotti and Coetzoer, 2006); associated with severe malaria in GWAS, but not to genome-wide significance (MGE Network, 2015)
EPB42	Allelic variants associated with hereditary elliptocytosis and spherocytosis, which protect from malaria (see text)
FPN/SLC40A1	Sole iron exporter in mature RBCs; Q248H variant has been linked to changes in iron levels and malaria resistance, though this is debated (Zhang et al. 2018; Muriuki et al., 2019)
G6PD	Multi-allelelic trait G6PD deficiency matches patterns of malaria endemicity and is associated with protection from malaria (see text)
GYPA	Receptor for P. falciparum ligands involved in invasion; accelerated evolution in Old World monkeys; association of some variants with malaria endemicity (Heathcote et al., 2011); involved in a complex structural rearrangement associated with 30% reduction in severe malaria risk (Leffler et al., 2017)
GYPB	Receptor for P. falciparum ligands involved in invasion; high variability in Africa; association of some variants with P. falciparum infection in Brazil (Tarazona-Santos et al., 2011); involved in complex structural rearrangement associated with 30% reduction in severe malaria risk (Leffler et al., 2017)
GYPC	Receptor for P. falciparum ligands involved in invasion ; exon 3 deletion protects from P falciparum invasion and is at high frequency in endemic Melanesia (Maier et al., 2003)
GYPE	Along with GYPA and GYPB, underlies the MNS blood group system; involved in complex structural rearrangement associated with 30% reduction in severe malaria (Leffler et al., 2017)
HBA1	Deletions cause alpha-thalassemia, a classic example of malaria-related balancing selection (see text)
HBA2	Deletions cause alpha-thalassemia, a classic example of malaria-related balancing selection (see text)
HBB	HbAS, HbAC, and other mutations are classic examples of malaria-related balancing selection (see text)
HP	Haptoglobin is toxic to parasites in vitro; CNV have been associated with lower malaria prevalence, though likely pleiotropic with other diseases (Rodriguez et al., 2012)
PIEZO1	Rare mutations causing xerocytosis are protective against P. falciparum; common deletion variant recently associated with malaria protection in humans, though mechanism still debated (Ma et al., 2018; Nguetse et al., 2020)
SLC4A1	A deletion causes Southeast Asian Ovalocytosis, which provides malaria resistance; selection among primates is consistent with malaria pressure (Steiper et al., 2012)
SPTA1	Many variants associated with hereditary elliptocytosis, which protects from malaria (see text); directly interacts with 3 P falciparum proteins; strong evidence of positive selection in mammals (Ebel et al., 2017)
SPTB	Allelic variants associated with hereditary elliptocytosis, which protects from malaria (see text); directly interacts with P. falciparum proteins
