# Supplementary material for: Common host variation drives malaria parasite fitness in healthy human red cells
Source: eLife. 2021 Sep 23;10:e69808. doi: 10.7554/eLife.69808 (PMC8497061; doi:10.7554/eLife.69808)
Supplement: Figure 5—source data 3. — Growth predictors selected in at least 40% of train data sets are indicated in bold. Genetic predictors are summarized in Figure 5A. NA indicates predictors that were only present as singletons in the smaller invasion data set. [file elife-69808-fig5-data3.xlsx]

## Sheet: Sheet1
	3D7 growth			Th.026 growth			3D7 invasion			Th.026 invasion
Predictor	Lasso support (%)	OLS Effect Size	OLS p value	Lasso support (%)	OLS Effect Size	OLS p value	Lasso support (%)	OLS Effect Size	OLS p value	Lasso support (%)	OLS Effect Size	OLS p value	Predictor	Chr	Position	rsID	Sample freq (non-carriers)	AFR freq (gnomAD)	EUR freq (gnomAD)	RBC trait associations from LDtrait, unless otherwise specified	Any trait associations from linked variants (r2>0.1) from LDtrait	SIFT/Polyphen (most extreme)
ABCB6 L39L	1.32	2.56265	0.405034	0.4	-0.781513	0.670702	15.65	-2.22351	0.428005	2.14	8.97788	0.0995757	ABCB6 L39L	chr2	219218557	rs1109866	0.389706	0.482315	0.902397	-	Platelet distribution width	-
ABCB6 R648Q	73.21	-12.8607	0.315259	0.04	2.12977	0.780996	NA	NA	NA	NA	NA	NA	ABCB6 R648Q	chr2	219212412	rs777092366	0.0147059	0.01	0	-	-	Possibly damaging
ABCB6 T521S	0.81	5.42605	0.607588	1.21	5.28456	0.40064	0.67	-1.34145	0.88049	15.23	45.4053	0.00739367	ABCB6 T521S	chr2	219213842	rs149363094	0.0220588	0.0176532	0.00444438	-	-	Benign
ANK A1462V	4.33	-4.81625	0.601478	11.75	-7.28333	0.182643	0.92	2.52139	0.815871	0.07	-5.81457	0.784243	ANK A1462V	chr8	41686157	rs34664882	0.0294118	0.0155566	0.0289882	Hemoglobin concentration, Immature fraction of reticulocytes, hemoglobin levels, MCHC, Mean retic volume, Glycated hemoglobin levels, Retic count and fraction	Lymphocyte counts, monocyte count, bilirubin levels, MCV, LDL cholesterol levels, RDW, RBC count, hemoglobin, apolipoprotein B levels	Deleterious
ANK1 G691G	28.03	-2.5782	0.52234	0.01	0.0475477	0.984233	12.45	-2.16338	0.532664	0.26	-4.30733	0.526491	ANK1 G691G	chr8	41706167	rs1137177	0.139706	0.02	0.28	-	-	-
ANK1 I990I	81.56	28.3271	0.0246985	86.18	17.8404	0.017373	0.98	-11.7637	0.274834	0.3	20.5865	0.330462	ANK1 I990I	chr8	41695322	rs34969689	0.0147059	0.0385	0.000139388	-	Glycated hemoglobin levels	-
ANK1 L971L	2.9	0.0687091	0.984988	0.05	0.972004	0.65494	0.1	0.348028	0.912953	0	1.2925	0.836011	ANK1 L971L	chr8	41696410	rs504574	0.191176	0.11	0.5	-	Reticulocyte count and fraction	-
ANK1 M1325V	2.25	2.17227	0.714954	3.77	-1.67095	0.637307	7.15	-6.24219	0.25713	0.87	-10.3232	0.340172	ANK1 M1325V	chr8	41690485	rs10093583	0.0588235	0.116776	0.00624206	-	Other (not related to RBCs)	Benign
ANK1 P199P	2.44	-0.721943	0.895934	7.66	-3.48883	0.286881	55.36	-11.7862	0.0125851	4.72	-16.8033	0.0735443	ANK1 P199P	chr8	41725776	rs2304873	0.0735294	0.0335823	0.136657	-	Other (not related to RBCs)	-
ANK1 S1162S	6.27	4.0434	0.496093	0.22	2.71448	0.443097	1.37	1.50864	0.830308	0	-0.706871	0.95918	ANK1 S1162S	chr8	41693944	rs35964634	0.0588235	0.128589	0.00140915	-	Glycated hemoglobin levels	-
ANK1 S594S	9.47	4.47503	0.672019	1.12	4.3076	0.493674	6.67	-1.88595	0.832578	4.82	-11.2509	0.519568	ANK1 S594S	chr8	41714174	rs61753679	0.0220588	0.00708714	0.0359035	-	-	-
ANK1 V150V	7.4	1.60013	0.779572	94.63	7.67754	0.0215715	22.45	10.8672	0.0277426	0.15	2.48572	0.801645	ANK1 V150V	chr8	41725923	rs6982971	0.0661765	0.0259817	0.0555487	-	Other (not related to RBCs)	-
ATP2B4 A937A	16.54	-19.1263	0.0670239	1.11	-4.70447	0.454581	3.98	-8.57095	0.427422	0.52	-22.6324	0.284232	ATP2B4 A937A	chr1	203721409	rs61731213	0.0220588	0.00304689	0.0168097	-	-	-
ATP2B4 F1136F	4.16	-1.946	0.854008	7.43	5.99824	0.339713	1.05	-0.0859626	0.992314	0.12	7.77848	0.656457	ATP2B4 F1136F	chr1	203739644	rs41264257	0.02205882	0.00873518	0.0462728	-	-	-
ATP2B4 N555N	0.67	10.6735	0.31102	1.01	0.642899	0.918774	1.61	4.03813	0.650576	0.07	1.85442	0.915618	ATP2B4 N555N	chr1	203709408	rs74402274	0.0220588	0.054728	0.000232328	-	-	-
ATP2B4 S37S	53.18	-5.89239	0.0747944	0.01	-0.807227	0.685598	5.62	-2.32759	0.425997	0.82	6.95873	0.223229	ATP2B4 S37S	chr1	203683316	rs1419114	0.213235	0.684239	0.889486	RDW	MCHC,RBC,malaria,HGB,MCV,others	-
BSG A16A	79.6	-7.13502	0.0357547	95.51	-4.42687	0.0286148	4.48	0.806763	0.801125	0.23	-1.72241	0.783944	BSG A16A	chr19	580665	rs4682	0.227941	0.298236	0.213399	eQTL for BSG (GTEx)	-	-
BSG D65D	35.97	4.01487	0.338341	3.4	-1.69219	0.499144	5.22	1.09554	0.767978	1.01	3.65901	0.61516	BSG D65D	chr19	579627	rs1803202	0.147059	0.179963	0.0986862	-	-	-
BSG L31L	31.05	37.5463	0.0343036	0.02	19.9795	0.0597252	6.21	-32.3648	0.0294389	10.27	45.8747	0.119379	BSG L31L	chr19	580710	rs1803535	0.00735294	0.00585101	0.0363631	-	-	-
BSG S74S	0.26	5.79229	0.583515	88.04	11.2664	0.0703828	0.34	-0.0170472	0.998476	9.95	23.9905	0.166818	BSG S74S	chr19	581371	rs11551900	0.0220588	0.0131967	1.55e-05	-	-	-
BSG T16A	5.52	4.96242	0.638666	0.03	3.59767	0.567756	14.68	6.35824	0.475109	0.16	-18.6181	0.284975	BSG T16A	chr19	572680	rs11551906	0.0220588	0.00404762	0.0223307	-	-	Benign
CD44 E374E	1.16	2.12477	0.558351	69.75	3.71012	0.0832722	5.53	-0.940865	0.769885	26.2	12.005	0.053071	CD44 E374E	chr11	35201756	rs11033026	0.198529	0.286148	0.00128567	-	-	-
CD44 G462G	3	-9.3668	0.46533	4.01	-3.04308	0.691097	NA	NA	NA	NA	NA	NA	CD44 G462G	chr11	35206215	rs149237473	0.0147059	0.00747619	0	-	-	-
CD44 H85H	1.09	-2.33715	0.563686	0.23	-0.178014	0.941259	9.85	-5.32447	0.196964	0.01	-2.05298	0.801191	CD44 H85H	chr11	35180295	rs1071695	0.176471	0.15	0.18	-	-	-
CD44 I479T	11.97	1.28708	0.833747	1.43	1.90845	0.601247	2.48	-2.2327	0.682269	0.92	14.5984	0.169065	CD44 I479T	chr11	35208126	rs1467558	0.926471	0.99	0.82	-	Other (not related to RBCs)	Tolerated low confidence
CD44 K417R	91.19	4.34612	0.205087	31.94	1.31711	0.521296	5.9	1.56854	0.621208	3.71	12.1231	0.0477704	CD44 K417R	chr11	35204608	rs9666607	0.764706	0.877875	0.681259	-	-	Benign
CD44 R463Q	0.68	-12.347	0.335123	0.31	-6.75422	0.376658	0.53	3.39774	0.753631	0.01	-5.6912	0.788714	CD44 R463Q	chr11	35206217	rs114247966	0.0147059	0.0252275	3.1e-05	-	-	Tolerated low confidence
CD44 T325T	74.6	-16.0822	0.0779213	91.41	-12.0743	0.0253224	6.2	-6.65793	0.391708	4.15	-20.3607	0.17966	CD44 T325T	chr11	35201134	rs35356320	0.0294118	0.023423	0.0601729	sQTL for CD44 (GTEx)	-	-
CD55 A227P	26.23	-8.86882	0.48948	0.1	-6.99802	0.35957	2.2	9.60526	0.373449	3.84	50.0569	0.0155757	CD55 A227P	chr1	207331122	rs60822373	0.0147059	0	0	-	-	Probably damaging
CD55 R432H	8.32	-9.13407	0.198448	0	-0.266632	0.950098	0.59	1.75532	0.786705	19.09	22.8916	0.0679139	CD55 R432H	chr1	207340604	rs28738991	0.0514706	0.0986739	0.00113171	-	-	Tolerated low confidence
CD55 V333I	1.25	10.777	0.400586	0.19	-1.68231	0.826195	7.17	-8.78996	0.415639	0.03	-4.02727	0.849622	CD55 V333I	chr1	207337346	rs116473488	0.0147059	0.0068079	0	-	-	Deleterious
CR1 G1887S	28.59	7.92044	0.224184	0.32	3.16872	0.416056	5.63	6.15778	0.428477	0.01	-0.555381	0.971039	CR1 G1887S	chr1	207618190	rs61730889	0.0441177	0.0527921	0.000170389	-	-	Possibly damaging
CR1 H1208R	6.73	1.89566	0.601641	78.44	3.6791	0.0859437	10.11	-0.996307	0.765841	0.01	5.43377	0.406352	CR1 H1208R	chr1	207580276	rs2274567	0.301471	0.219684	0.181199	-	Erythrocyte sedimentation rate	Probably damaging
CR1 I1561M	7.41	12.7778	0.318413	8.33	3.01146	0.694147	NA	NA	NA	NA	NA	NA	CR1 I1561M	chr1	207609424	rs41274768	0.0147059	0.00501855	0.0288578	-	-	Probably damaging
CR1 I1615V	7.31	-3.36724	0.262968	0.34	-1.48068	0.409931	0.25	-3.25721	0.241628	36.89	-14.6485	0.00577387	CR1 I1615V	chr1	207609586	rs6691117	0.397059	0.778886	0.213201	-	Erythrocyte sedimentation rate	Benign
CR1 N1540S	5.53	4.2152	0.543899	0.01	3.32614	0.421211	2.91	5.55528	0.342171	22.24	-21.3558	0.0595864	CR1 N1540S	chr1	207609362	rs17259045	0.0367647	0.0218415	0.105468	-	Other (not related to RBCs)	Benign
CR1 P1199L	1.3	-8.19029	0.523417	0.73	-4.85537	0.525684	5.97	2.54455	0.81421	4.73	11.6443	0.5831	CR1 P1199L	chr1	207580249	rs147654348	0.0147059	0.00595522	3.1e-05	-	-	Possibly damaging
CR1 R2026Q	24.39	10.9359	0.393639	0.22	2.45119	0.748961	2.04	3.23972	0.764752	0.03	-3.00339	0.887564	CR1 R2026Q	chr1	207630591	rs115510609	0.0147059	0.0106221	0.000371782	-	-	Tolerated low confidence
CR1 T1408A	8.53	9.2051	0.473101	0.05	8.99503	0.237953	76.6	28.4551	0.00662531	0.01	-23.1115	0.274054	CR1 T1408A	chr1	207587427	rs61734514	0.0147059	0	0.03	-	-	Possibly damaging
CR1 T1969A	79.07	-4.93063	0.190922	0.12	-0.117962	0.958407	3.53	-0.639331	0.858318	0.06	0.736317	0.91653	CR1 T1969A	chr1	207621975	rs2296160	0.801471	0.82	0.82	-	Erythrocyte sedimentation rate	Benign
EPB41 T770T	15.65	-1.67698	0.690067	0.42	0.14962	0.952432	1.9	-1.78704	0.649514	0.01	2.07893	0.787654	EPB41 T770T	chr1	29115779	rs536178	0.147059	0.24	0.07	-	Blood pressure	-
EPB41 V214I	3.19	-5.03549	0.695114	0.05	-0.3803	0.960417	1.25	-1.4191	0.895746	0	-18.3938	0.384969	EPB41 V214I	chr1	28993501	rs111642750	0.0147059	0	0.04	HGB	Other (not related to RBCs)	Deleterious
EPB42 D116Y	4.63	2.11791	0.869131	4.23	8.47055	0.266725	0.89	4.35324	0.687514	0.01	-5.36868	0.800434	EPB42 D116Y	chr15	43215269	rs113768282	0.0147059	0.00880575	0	-	-	Probably damaging/deleterious
EPB42 H619Q	68.18	-19.0324	0.135412	1.46	-8.4569	0.267504	15.07	10.06	0.351084	0.03	0.031811	0.998805	EPB42 H619Q	chr15	43203127	rs114354377	0.0147059	0.0197619	4.65e-05	-	-	Benign
EPB42 S10L	0.5	-7.89356	0.454528	0.05	0.323778	0.959041	0.65	0.884591	0.934903	7.23	24.3291	0.24929	EPB42 S10L	chr15	43220797	rs77809780	0.0220588	0.0871317	0.000418254	-	-	Tolerated low confidence
FPN Q248H	1.06	6.12728	0.389978	1.74	-2.51571	0.554342	7.9	9.75179	0.162354	8.31	30.4057	0.0243152	FPN Q248H	chr2	189565370	rs11568350	0.0514706	0.0505754	9.29e-05	-	-	Benign
FPN V221V	11.65	1.88797	0.519515	2.82	1.22969	0.481411	0.6	0.308414	0.908281	2.6	-9.03198	0.081231	FPN V221V	chr2	189565451	rs2304704	0.419118	0.23085	0.62048	-	MCH,RBC, RDW,iron binding capacity,MCHC	-
G6PD P477P	34.65	-3.46762	0.641779	0.04	-0.296979	0.94675	0.61	-7.41138	0.492871	0	3.86977	0.855438	G6PD P477P	chrX	154532214	rs77214077	0.0294118	0.0778903	0.000159458	-	-	-
G6PD Q372Q	0.76	1.89551	0.638353	5.29	2.06482	0.389427	1.31	-2.44581	0.579353	32.8	18.1855	0.0321972	G6PD Q372Q	chrX	154532738	rs2230036	0.110294	0.105554	0.000474233	-	-	-
GYPB S58T	70.28	5.11952	0.184994	18.23	-1.05125	0.649865	2	-0.50375	0.882023	1.06	4.40894	0.507051	GYPB S58T	chr4	143997559	rs1132783	0.169118	0.0782653	0.226959	Splice acceptor (gnomad)	-	Benign/tolerated low confidence
GYPB T22M	0.68	-0.713437	0.836712	10.7	1.49315	0.468451	2.2	-0.400436	0.904753	2.02	-10.4272	0.10806	GYPB T22M	chr4	143999443	rs7683365	0.220588	0.19	0.33	-	RDW,Retics,Glycated hemoglobin	-
GYPC G111G	0.64	0.18842	0.950709	1.9	1.84764	0.307257	9.69	2.41521	0.392935	4.68	6.90129	0.2116	GYPC G111G	chr2	126696088	rs1050967	0.573529	0.74	0.55	-	Other (not related to RBCs)	-
GYPC Y83C	85.29	25.3919	0.0449001	0.06	13.2491	0.0802418	1.07	-11.404	0.289936	13.35	32.4542	0.122556	GYPC Y83C	chr2	126696003	rs115178969	0.0147059	0.0133701	4.65e-05	-	-	Deleterious
HBB H3H	4.06	-0.38205	0.932663	9.7	2.63774	0.325954	1.76	0.457261	0.908165	0.05	-1.57751	0.839204	HBB H3H	chr11	5227013	rs713040	0.860294	0.868046	0.840753	-	-	-
HP H303H	28.51	7.74256	0.546438	12.85	-6.03809	0.429609	NA	NA	NA	NA	NA	NA	HP H303H	chr16	72060755	rs5477	0.0147059	0.0153916	0.00153322	-	-	-
PIEZO1 A1624A	95.24	-30.6305	0.0148132	70.95	-16.6969	0.0264093	2.05	-13.0672	0.224541	0.03	-0.436105	0.983622	PIEZO1 A1624A	chr16	88722301	rs35375982	0.0147059	0.0369595	0.000418203	-	-	-
PIEZO1 A1846A	1.4	-0.116886	0.979377	0.67	0.969176	0.719017	1.62	1.2325	0.75577	0.2	-0.0729963	0.99251	PIEZO1 A1846A	chr16	88721296	rs8043924	0.860295	0.85	0.87	-	Glycated hemoglobin levels, MCV, MCHC, others	-
PIEZO1 A185A	88.63	15.9905	0.0188868	0.06	3.20579	0.438291	22.29	9.61404	0.0974091	0.06	-0.717092	0.950357	PIEZO1 A185A	chr16	88738647	rs115481622	0.0367647	0.0485014	0.000836535	-	-	-
PIEZO1 A21A	1.4	0.944785	0.777686	0.63	0.0134011	0.994641	9.72	-3.99437	0.169493	0.36	-9.34513	0.10004	PIEZO1 A21A	chr16	88784902	rs2911442	0.213235	0.111523	0.40824	-	MCHC,RDW,MCV,Retics,HGB,HCT,Glycated hemoglobin,RBC,others	-
PIEZO1 E756del	26.74	-4.46811	0.417076	94.47	-7.87866	0.0142956	1.36	2.44631	0.614062	17.13	22.4473	0.0155709	PIEZO1 E756del	chr16	88733964	rs59446030	0.0735294	0.1645	0.0005942	see Ma et al., 2018 and Nguetse et al., 2020	Severe malaria (humans), cerebral malaria (mice)	-
PIEZO1 F2074F	2.09	-5.49476	0.603038	0.75	1.96709	0.754943	20.28	-10.4192	0.240022	0.3	15.8108	0.364576	PIEZO1 F2074F	chr16	88719903	rs34388120	0.0220588	0.0204567	0.000154871	-	-	-
PIEZO1 F2454F	49.17	4.03304	0.272531	1.29	2.39256	0.274826	18.03	6.44663	0.0915986	0.5	-6.97919	0.356096	PIEZO1 F2454F	chr16	88715809	rs35544968	0.176471	0.20594	0.100688	-	Other (not related to RBCs)	-
PIEZO1 I240V	63.68	11.9415	0.256562	0.86	-0.601557	0.923981	10.7	14.7166	0.170587	84.11	81.165	3.85611e-05	PIEZO1 I240V	chr16	88738357	rs114403731	0.0220588	0.0115597	3.1e-05	-	-	Benign
PIEZO1 I83T	0.72	-1.55829	0.79938	0.34	1.10074	0.76325	3.57	-2.25404	0.666319	0.01	-2.05041	0.841603	PIEZO1 I83T	chr16	88742335	rs6500495	0.926471	0.96	0.86	-	Other (not related to RBCs)	Benign
PIEZO1 L1878del	1.19	1.46078	0.697017	0.12	1.07938	0.629232	3.26	-5.52298	0.111904	0.13	-2.07381	0.763414	PIEZO1 L1878del	chr16	88721199	rs3217718	0.220588	0.171567	0.352877	-	MCV, MCHC, RDW, Glycated hemoglobin levels, others	-
PIEZO1 L514L	4.34	1.15563	0.839838	0.26	4.38629	0.195323	1.73	3.78784	0.451692	18.49	-17.7953	0.0679934	PIEZO1 L514L	chr16	88736165	rs78905828	0.0661765	0.0685626	0.136155	-	Other (not related to RBCs)	-
PIEZO1 P2353P	71.28	8.5077	0.10083	0.16	2.68408	0.388651	1.09	3.27613	0.466836	0.01	6.78959	0.441887	PIEZO1 P2353P	chr16	88716268	rs2290902	0.889706	0.840846	0.905431	-	MCV, MCHC, and others	-
PIEZO1 Q749del	17.29	2.59538	0.676519	10.46	6.16071	0.0932868	1.04	5.69739	0.301467	0.58	-15.4796	0.150517	PIEZO1 Q749del	chr16	88733987	rs144777557	0.0514706	0.05972	0.1344	-	Glycated hemoglobin levels	-
PIEZO1 S2226S	0.77	-1.51539	0.869593	1.37	-1.96845	0.720404	4.9	-5.58486	0.472899	0.02	-0.10377	0.994588	PIEZO1 S2226S	chr16	88716881	rs34655152	0.0294118	0.0073942	0.0155926	-	Other (not related to RBCs)	-
PIEZO1 S338Y	1.84	-2.08626	0.821168	0.08	-2.99323	0.586025	8.6	5.81946	0.454418	0.24	9.35555	0.540136	PIEZO1 S338Y	chr16	88737941	rs112081600	0.0294118	0.0537829	0.0310032	-	Other (not related to RBCs)	Deleterious
PIEZO1 V1310I	0.3	-1.44011	0.876019	0.04	3.90875	0.47662	2.42	5.02905	0.518246	0.02	1.14985	0.940081	PIEZO1 V1310I	chr16	88726324	rs34606201	0.0294118	0.0102953	4.65e-05	-	-	Deleterious
PIEZO1 V2385M	31.35	37.5463	0.0343036	0.02	19.9795	0.0597252	6.04	-32.3648	0.0294389	8.58	45.8747	0.119379	PIEZO1 V2385M	chr16	88716096	rs369319123	0.00735294	0.00161658	3.1e-05	-	-	Probably damaging
PIEZO1 V250A	12.05	-6.54174	0.233759	0.62	-0.555385	0.86603	0.27	3.85843	0.427698	0.68	-4.93948	0.605294	PIEZO1 V250A	chr16	88738326	rs7184427	0.9044118	0.878539	0.850968	-	Glycated hemoglobin levels, others	Deleterious
PIEZO1 V250I	11.07	0.0785357	0.995126	0.03	-0.318255	0.966871	5.06	-3.69622	0.732762	16.06	31.7918	0.130546	PIEZO1 V250I	chr16	88738327	rs115486714	0.0147059	0.0277302	0.000139366	-	Other (not related to RBCs)	Benign
PIEZO1 V394L	76.67	3.42237	0.33827	5.74	3.19896	0.131181	3.2	3.00358	0.343545	0.03	-3.06511	0.623194	PIEZO1 V394L	chr16	88737574	rs6500493	0.735294	0.728756	0.674066	RDW	MCV,MCHC, others	Benign
PIEZO1 Y2500Y	7.95	-4.48475	0.463705	0.62	-0.658567	0.857014	2.16	-0.810471	0.88753	0.12	-4.98709	0.657019	PIEZO1 Y2500Y	chr16	88715671	rs1061228	0.0735294	0.0344623	0.133145	-	MCH, Glycated hemoglobin levels, hair color	Deleterious low confidence
SLC4A1 D38A	10.37	11.9554	0.256	29.21	7.46061	0.234134	3.49	8.33633	0.348275	0.55	5.92347	0.734907	SLC4A1 D38A	chr17	44261630	rs5035	0.0220588	0.00898303	0.0378201	-	-	Benign
SLC4A1 K56E	3.09	-2.66158	0.629369	0.02	0.664645	0.839883	1.9	-4.6336	0.321543	0.02	5.60786	0.54189	SLC4A1 K56E	chr17	44261577	rs5036	0.0735294	0.0988854	0.0232681	Hemoglobin levels	HCT, Hemoglobin, Glycated hemoglobin levles, MCV, Retic count, others	Benign
SLC4A1 K590K	64.15	-14.6261	0.163595	6.7	-9.86217	0.114284	6.42	-2.69505	0.762537	4.93	-30.3461	0.0787448	SLC4A1 K590K	chr17	44255703	rs35807245	0.0220588	0.00354711	0.0199808	-	-	-
SLC4A1 L308L	0.34	-0.539296	0.953413	1.71	2.03663	0.711137	0.98	0.830337	0.915207	0.02	-4.87401	0.749909	SLC4A1 L308L	chr17	44258576	rs5013	0.0294118	0.0545814	0.000186	-	-	-
SLC4A1 L417L	11.64	-9.75609	0.446913	0.07	5.06501	0.507907	10.56	14.7637	0.1692	0.01	-7.86068	0.711201	SLC4A1 L417L	chr17	44258019	rs5015	0.0147059	0.00828177	0.0435409	-	-	-
SLC4A1 L441L	98.71	24.412	0.00653673	91.17	11.368	0.0356447	14.38	-0.882368	0.909915	0.06	2.31594	0.879653	SLC4A1 L441L	chr17	44257767	rs5017	0.0294118	0.0143714	0.0817841	-	-	-
SLC4A1 S700S	0.32	0.948778	0.918135	0.17	-0.0977868	0.985821	0.31	2.25017	0.835385	0.15	15.8938	0.453225	SLC4A1 S700S	chr17	44253329	rs5024	0.0294118	0.0320754	0.000154895	-	-	-
SLC4A1 V862I	37.14	-4.14474	0.48532	66.79	-6.68656	0.05595	7.51	6.31024	0.228133	3.71	17.1357	0.0932045	SLC4A1 V862I	chr17	44251230	rs5026	0.0588235	0.0943212	0.00015488	-	-	Benign
SPTA V42V	23.27	2.08582	0.744764	0.6	2.79829	0.462983	1.74	-4.36381	0.445202	0.02	-0.316909	0.977509	SPTA V42V	chr1	158685246	rs435080	0.933824	0.9111	0.999721	-	-	-
SPTA1 A1764A	4.69	1.54032	0.63446	0.19	0.113405	0.953208	27.58	4.53682	0.114713	8.42	10.1966	0.0696973	SPTA1 A1764A	chr1	158636659	rs3738791	0.345588	0.48	0.31	-	MCH,RBC,RDW,HGB,other	-
SPTA1 A1998P	46.02	-6.88873	0.181944	40	-6.27193	0.0395986	12.33	4.05657	0.402081	45.91	27.4022	0.00275784	SPTA1 A1998P	chr1	158623111	rs77877855	0.0882353	0.14528	0.01496	-	MCHC,RDW,Retics,MCH,WBC	Deleterious
SPTA1 A970D	20.48	-11.5766	0.366357	5.98	-3.38433	0.658496	NA	NA	NA	NA	NA	NA	SPTA1 A970D	chr1	158654738	rs35948326	0.0147059	0.00916623	0.0488081	-	MCHC,RDW	Benign
SPTA1 D152N	2.32	9.51025	0.155143	0.03	2.64244	0.510102	10.65	-2.69043	0.638414	0.05	-1.94558	0.862576	SPTA1 D152N	chr1	158681604	rs16840544	0.0588235	0.111408	0.000526593	-	-	Benign
SPTA1 D1971N	0.23	2.99832	0.745233	21.72	-10.6624	0.0492421	0.57	4.77487	0.539688	0.04	22.6516	0.134731	SPTA1 D1971N	chr1	158623192	rs116466258	0.0294118	0.0114091	6.2e-05	-	-	Deleterious
SPTA1 E2224D	26.67	2.15452	0.866889	0.45	-1.35596	0.859527	1.62	2.18174	0.840324	1.76	-2.66616	0.90012	SPTA1 E2224D	chr1	158615332	rs142775522	0.0147059	0.0160301	1.55e-05	-	-	Deleterious
SPTA1 K1693Q	5.12	2.72046	0.465595	0.35	-0.089153	0.968065	12.37	-5.12289	0.121791	0.01	-6.67377	0.307047	SPTA1 K1693Q	chr1	158638145	rs857725	0.242647	0.121726	0.263837	HGB	Retics,MCHC,RDW,MCV,MCH,other	Benign
SPTA1 L1858V	3.54	5.87286	0.100141	0.01	3.078	0.149224	0.17	1.70423	0.610173	0.03	-0.477907	0.941962	SPTA1 L1858V	chr1	158627717	rs3737515	0.213235	0.198487	0.289308	MCV	MCV, RDW, MCHC, Retic volume, Retic count, RBC count, MCH, others	Deleterious
SPTA1 L958L	97.17	5.41799	0.0750463	0.21	0.305226	0.867959	2.29	0.811287	0.766681	0.02	1.71246	0.74948	SPTA1 L958L	chr1	158656588	rs857691	0.566176	0.700624	0.248876	glycated hemoglobin	RDW,MCV,retics, lymphocytes, 'other erythrocyte phenotypes'
SPTA1 P1050L	42.88	-15.9443	0.212162	0	1.41182	0.853802	14.31	17.7943	0.0962095	0.05	-3.93609	0.852988	SPTA1 P1050L	chr1	158653313	rs116297260	0.0147059	0.0216884	0	-	-	-
SPTA1 Q1796Q	99.98	-25.9944	0.00115197	16.68	-8.1849	0.0953913	15.49	-8.80986	0.321353	2.51	-21.2869	0.220789	SPTA1 Q1796Q	chr1	158635957	rs61140046	0.0367647	0.0783637	0.000201344	-	-	-
SPTA1 R1133P	8.79	-5.12551	0.627659	24.96	-10.7449	0.0847623	9.21	-8.25317	0.44485	0.11	-2.85887	0.892942	SPTA1 R1133P	chr1	158651446	rs35733059	0.0220588	0.02	0	-	-	Probably damaging/deleterious
SPTA1 R1330I	2.91	2.07464	0.844474	0.17	2.8882	0.646606	1.22	8.13291	0.360256	5.8	15.4799	0.374773	SPTA1 R1330I	chr1	158645502	rs34214405	0.0220588	0.0307249	6.2e-05	-	-	Deleterious
SPTA1 T360S	1.29	8.97532	0.329157	0.09	2.32068	0.672992	1.95	-0.986221	0.899364	0.12	21.8892	0.148631	SPTA1 T360S	chr1	158676175	rs34133563	0.0294118	0.0135881	1.55e-05	-	-	Benign
SPTB E978E	98.93	29.2541	0.020198	14.09	10.0648	0.186082	NA	NA	NA	NA	NA	NA	SPTB E978E	chr14	64787031	rs72724498	0.0147059	0	0.02	-	MCH	-
SPTB F222F	68.44	19.7526	0.0583405	27.18	13.5214	0.0289685	8.42	-13.1962	0.135236	1.34	37.7119	0.0276714	SPTB F222F	chr14	64801382	rs17102119	0.0220588	0.043165	0.00190456	-	-	-
SPTB G1408R	10.87	7.02883	0.15016	0.08	2.9011	0.321049	1.57	0.81284	0.851463	0.12	3.42265	0.687533	SPTB G1408R	chr14	64782334	rs17245552	0.132353	0.07687	0.0537435	-	RDW	Probably damaging/deleterious
SPTB R1403Q	19.93	-15.4623	0.226473	0.89	0.53763	0.944064	16.76	9.22457	0.392818	0.32	3.53584	0.867796	SPTB R1403Q	chr14	64782348	rs17180350	0.0147059	0	0.09	-	Other (not related to RBCs)	Benign
SPTB S439N	98.93	6.07791	0.0641876	3.89	1.18444	0.549769	2.95	-0.560687	0.852261	0.66	1.04584	0.859432	SPTB S439N	chr14	64796582	rs229587	0.507353	0.631296	0.333581	-	RDW,MCHC,Retics,other	Benign
SPTB T59T	94.93	6.97873	0.274057	2.01	2.57561	0.499469	8.98	4.02846	0.481125	0.14	-0.686625	0.951295	SPTB T59T	chr14	64805062	rs2277503	0.0661765	0.0379271	0.0464036	-	RDW	-
SPTB Y269Y	36.54	37.5463	0.0343036	0.03	19.9795	0.0597252	10.31	-32.3648	0.0294389	11.69	45.8747	0.119379	SPTB Y269Y	chr14	64800825	rs115882528	0.00735294	0.00496886	3.1e-05	-	-	-
PC1	0.46	122.08	0.415908	0	-4.43752	0.960531	0.08	50.1766	0.705983	49.89	722.816	0.00407211	PC1
PC2	69	-326.006	0.102885	0.43	-44.5021	0.711413	0.27	76.8431	0.659362	14.77	-783.108	0.0190193	PC2
PC3	2.8	-90.8247	0.836097	0.03	227.579	0.383155	12.25	-584.58	0.119633	0.02	-1328.12	0.0703724	PC3
PC4	2.26	-263.594	0.273399	0.42	-178.593	0.212525	4.95	204.152	0.3187	35.62	-915.082	0.0201294	PC4
PC5	4.43	-511.713	0.127805	0.1	-224.988	0.263254	1.59	164.987	0.589281	0.01	431.879	0.470771	PC5
PC6	4.88	-46.243	0.741646	0.05	-104.566	0.208497	0.15	-80.747	0.538855	10.39	423.653	0.0966149	PC6
PC7	1.88	65.6831	0.480972	0.06	31.1536	0.575213	11.92	117.508	0.16638	0.12	-97.5399	0.56089	PC7
PC8	0.85	-78.666	0.53529	0.06	-55.9206	0.459413	0.65	-92.3475	0.445161	0	-1.93896	0.993496	PC8
PC9	5.08	-77.0533	0.0405843	2.73	-38.7322	0.0856462	41.37	69.8471	0.0266763	1.1	-86.057	0.169627	PC9
PC10	3.02	-273.875	0.195263	0.11	-173.287	0.168833	13.82	187.284	0.349328	0	269.841	0.492583	PC10
Age	29.06	0.276424	0.122147	22.3	0.177738	0.0949064	10.39	0.134887	0.404647	0.09	0.203458	0.522164	Age
CHCM	0.98	-5.17278	0.0240312	0	-1.54713	0.264449	42.75	-5.56849	0.00573225	54.54	-11.3706	0.00391672	CHCM
DIhyper	0.27	467.312	0.00194568	0.41	221.561	0.0150703	0.19	44.1229	0.768629	4.71	526.46	0.069467	DIhyper
DImax	99.81	261.494	0.000498734	28.64	120.857	0.00808314	0.05	22.8356	0.762175	0.49	253.644	0.0825067	DImax
DImin	2.84	389.901	0.0134754	0.03	51.8948	0.589386	0.62	139.145	0.330917	0	448.275	0.107679	DImin
HCT	26.12	0.720686	0.315086	0.01	0.00557029	0.989646	1.28	0.023766	0.971969	0	0.056683	0.96592	HCT
HDW	17.3	-5.66667	0.601973	0.03	-4.88307	0.45032	2.04	-7.58873	0.419366	0.04	-1.43752	0.93802	HDW
HGB	0.08	0.650377	0.725105	0.01	-0.382005	0.728962	0.68	-1.38361	0.405063	0.02	-2.88884	0.375271	HGB
Matrix_4	94.45	0.398957	0.0357749	0.12	0.105169	0.359663	2.16	0.308333	0.0974848	6.27	0.870875	0.0155417	Matrix_4
Matrix_5	0.21	-0.380651	0.0428201	0	-0.0930577	0.412229	0.7	-0.304989	0.0962672	0	-0.848956	0.0167782	Matrix_5
Matrix_6	3.75	-99.6985	0.0813709	0.05	-30.7052	0.371937	1.36	-59.0043	0.229825	0.27	-136.997	0.154112	Matrix_6
Matrix_7	23.58	-19.1233	0.351767	2.27	-14.7741	0.226411	1.6	16.8226	0.346394	0.01	-3.53239	0.920025	Matrix_7
Matrix_8	0	-8.97075	0.224084	82.93	-12.0392	0.00504586	0.43	5.69994	0.388073	0.03	6.64331	0.60883	Matrix_8
MCH	0.08	2.34752	0.0716967	3.49	1.84621	0.0164412	19.64	-2.4304	0.0530842	0.03	-1.95752	0.433518	MCH
MCHC	0.12	-3.14085	0.224489	0	-1.2498	0.418882	50.41	-6.41545	0.00582138	1.08	-10.5217	0.0225236	MCHC
MCV	73.33	1.70671	0.00128598	96.79	1.04635	0.000903176	0.83	-0.439811	0.392234	0.02	0.538529	0.594024	MCV
MPV	63.46	3.34217	0.162974	0.06	0.485978	0.735383	0.75	-0.623518	0.781139	0.05	-1.64728	0.708168	MPV
Ohyper	70.25	0.587779	0.00313313	90.74	0.3192	0.00745217	45.06	0.49514	0.00784098	55.83	1.02018	0.00506949	Ohyper
Omax	0.87	0.119682	0.662681	0.18	-0.0179353	0.91273	1.07	0.0395697	0.883359	0.03	0.11848	0.822768	Omax
Omin	0.52	-0.430025	0.32533	0.33	-0.113993	0.662748	3.3	-0.0434543	0.91609	0.04	0.104889	0.896837	Omin
O50 (Fragility)	89.88	-2.38274	0.00533872	4.97	-0.682979	0.190385	2.68	-0.777516	0.304492	0	-2.28498	0.121677	O50 (Fragility)
PLT	0.97	-0.0452386	0.370584	0.07	-0.00829592	0.783542	15.72	-0.0628222	0.159645	0.35	-0.0170179	0.847333	PLT
RBC	55.38	0.34799	0.949076	0.12	-1.99818	0.537802	2.53	0.696514	0.895132	0.16	7.00558	0.498244	RBC
RDW	0.49	2.48578	0.499789	10.49	-2.68553	0.219434	7.88	-0.608132	0.857731	0	5.47085	0.409613	RDW
Sex	1.09	0.45184	0.918054	0.77	2.69843	0.300661	2.09	2.53657	0.522492	7.15	7.28672	0.34795	Sex
