# Supplementary material for: Common host variation drives malaria parasite fitness in healthy human red cells
Source: eLife journal article supplement (doi:10.7554/elife.69808), 2021-09-23
Supplement: supp [file elife-69808-supp-v1.zip]

| Raw Growth (multiplication rate) |                      |           |                      |           |
|----------------------------------|----------------------|-----------|----------------------|-----------|
| 3D7                              |                      |           | Th.026.09            |           |
| Overall batch effect model       | R <sup>2</sup> (adj) | p-value   | R <sup>2</sup> (adj) | p-value   |
|                                  | 0.398                | < 2.2e-16 | 0.477                | < 2.2e-16 |
| Variable                         | beta                 | p-value   | beta                 | p-value   |
| Intercept                        | 0.652                | 0.076     | 0.586                | 0.012     |
| raw PMR in weekly control (1111) | 0.765                | < 2e-16   | 0.740                | < 2e-16   |
| RBC age                          | 1.995                | 0.000     | NS                   | NS        |

| Raw Invasion (multiplication rate) |                      |           |                      |           |
|------------------------------------|----------------------|-----------|----------------------|-----------|
| 3D7                                |                      |           | Th.026.09            |           |
| Overall batch effect model         | R <sup>2</sup> (adj) | p-value   | R <sup>2</sup> (adj) | p-value   |
|                                    | 0.757                | < 2.2e-16 | 0.644                | < 2.2e-16 |
| Variable                           | beta                 | p-value   | beta                 | p-value   |
| Intercept                          | 1.839                | 1.46E-07  | 1.843                | 1.98E-06  |
| raw PMR in weekly control (1111)   | 0.908                | < 2e-16   | 0.873                | < 2e-16   |
| RBC age                            | NS                   | NS        | -1.299               | 3.77E-10  |
| day 0 parasitemia                  | -3.17981             | 2.98E-11  | -3.2224              | 1.32E-07  |
| experimenter                       | 1.42344              | 1.67E-06  | NA                   | NA        |
