# Supplementary material for: Common host variation drives malaria parasite fitness in healthy human red cells
Source: eLife journal article supplement (doi:10.7554/elife.69808), 2021-09-23
Supplement: supp [file elife-69808-supp-v1.zip]

| Phenotype        | variants associated by Lasso | variance explained by all Lasso variants | novel variants (undiscovered by previous GWAS) | variance explained by novel variants |
|------------------|------------------------------|------------------------------------------|------------------------------------------------|--------------------------------------|
| 3D7 growth       | 26                           | 0.732                                    | 12                                             | 0.415                                |
| Th.026.09 growth | 10                           | 0.465                                    | 5                                              | 0.230                                |
