# Supplementary material for: Common host variation drives malaria parasite fitness in healthy human red cells
Source: eLife journal article supplement (doi:10.7554/elife.69808), 2021-09-23

### RBC Matrix from Advia Hematology Analyzer

|            | HC < 28 | HC = 28-41 | HC > 41 |
|------------|---------|------------|---------|
| V > 120    | M1      | M2         | M3      |
| V = 60-120 | M4      | M5         | M6      |
| V < 60     | M7      | M8         | M9      |

**HC** = hemoglobin concentration (g/dL)  
**V** = volume (fL)  
**M1-M9** reflect the the percentage of RBCs in each region of the cytogram

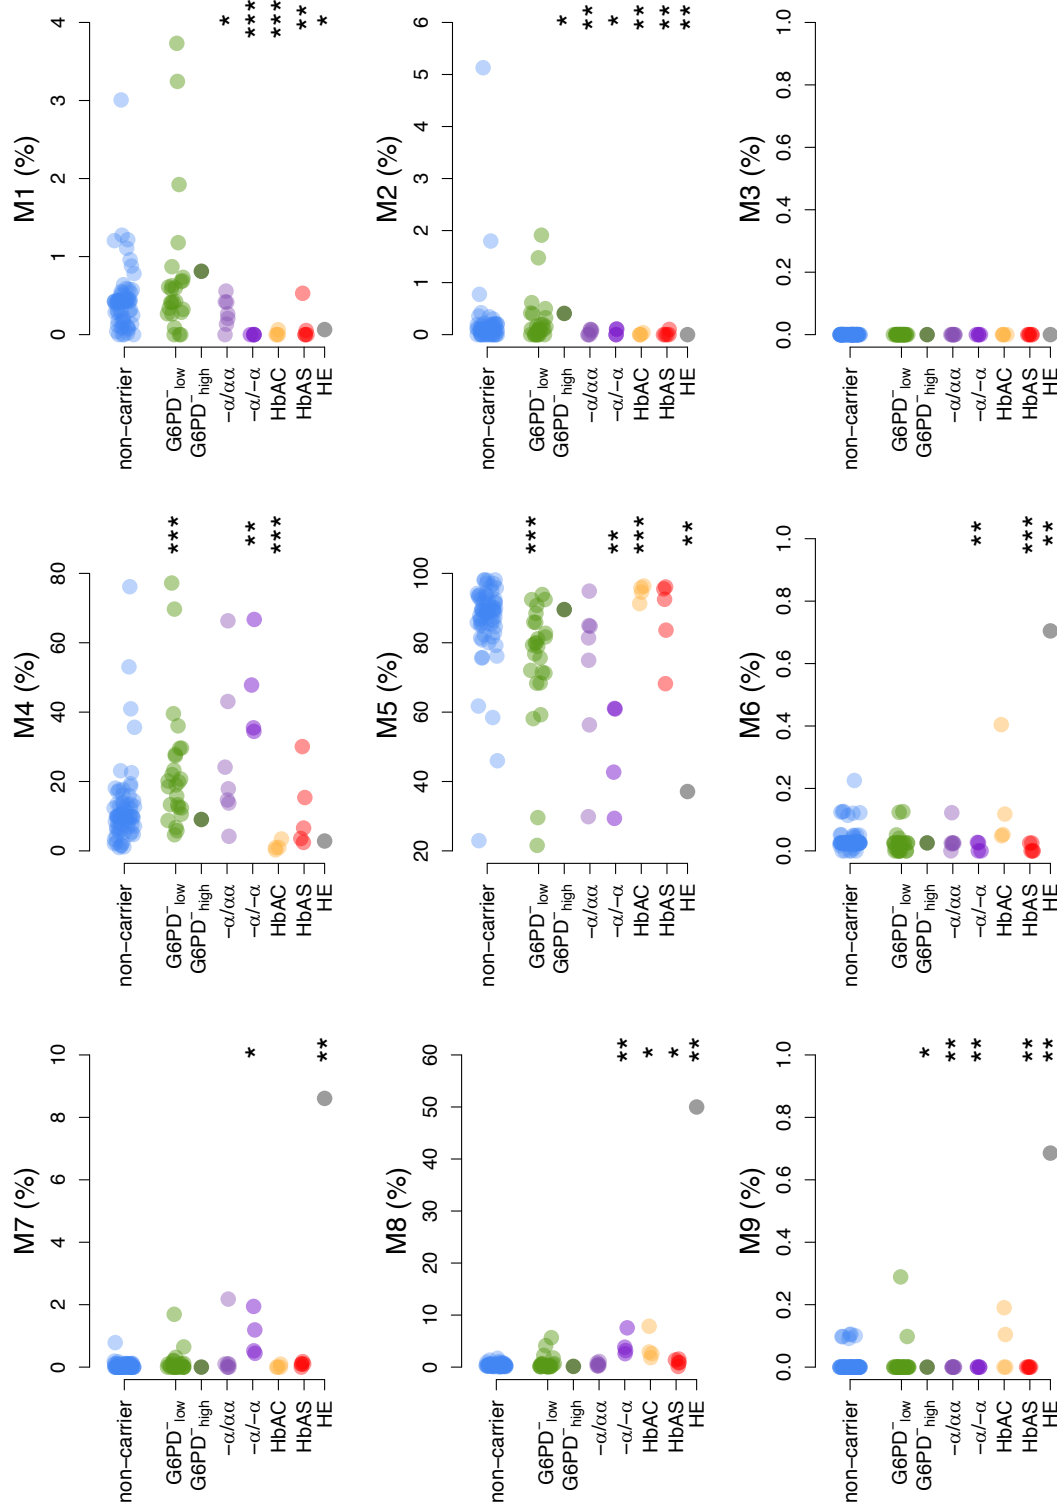

Supplement: supp [file elife-69808-supp-v1.zip]
