# Supplementary material for: Common host variation drives malaria parasite fitness in healthy human red cells
Source: eLife journal article supplement (doi:10.7554/elife.69808), 2021-09-23
Supplement: supp [file elife-69808-supp-v1.zip]

|                    | PIEZO1 rs59446030 |                       | ATP2B4 rs1419114 |                       |
|--------------------|-------------------|-----------------------|------------------|-----------------------|
|                    | All non-carriers  | Excluding homozygotes | All non-carriers | Excluding homozygotes |
|                    | p value           |                       | p value          |                       |
|                    |                   |                       |                  |                       |
| CHCM               | 0.234             | 0.573                 | 0.787            | 0.404                 |
| MCHC               | 0.382             | 0.770                 | 0.907            | 0.136                 |
| Ohyper             | 0.818             | 0.750                 | 0.354            | 0.536                 |
| Osmo50 (fragility) | 0.395             | 0.187                 | 0.107            | 0.693                 |
