# Supplementary figures and images for: Common host variation drives malaria parasite fitness in healthy human red cells
Source: eLife journal article supplement (doi:10.7554/elife.69808), 2021-09-23

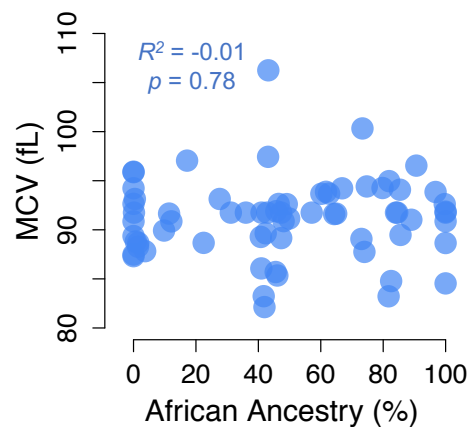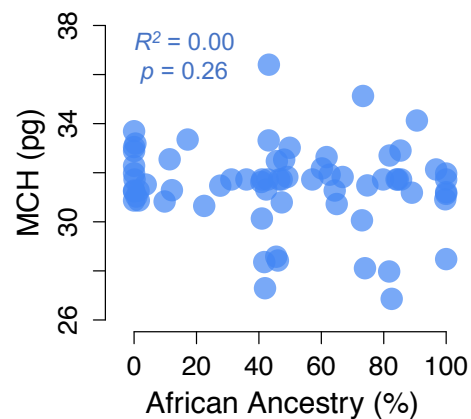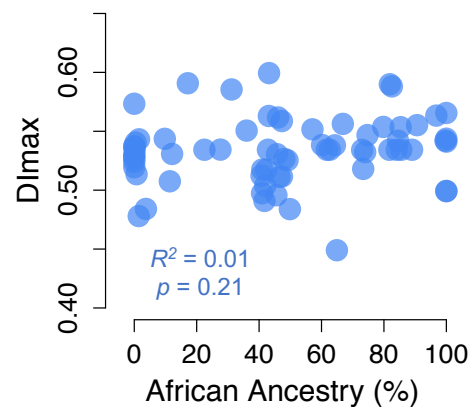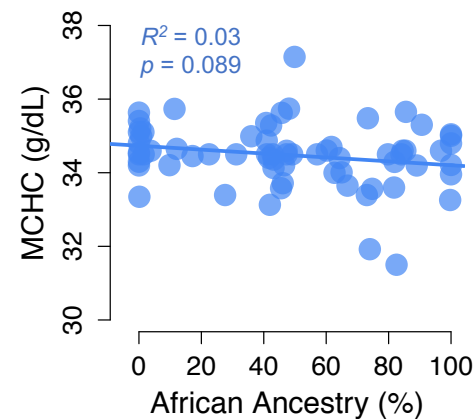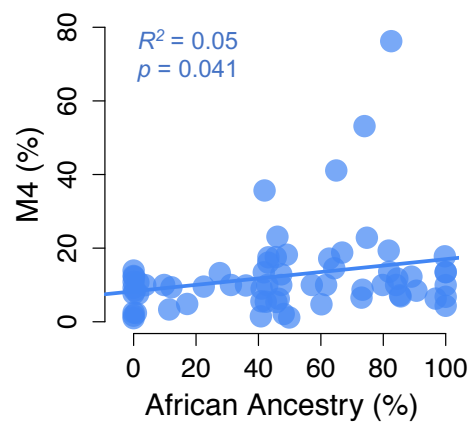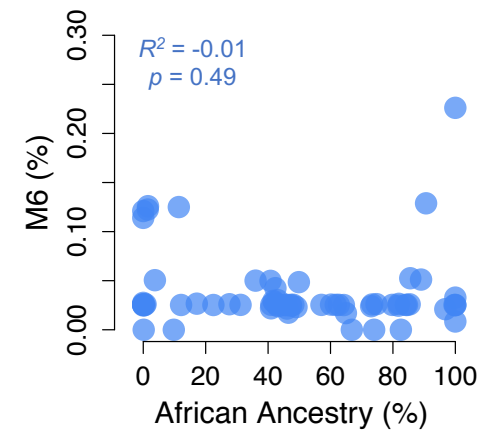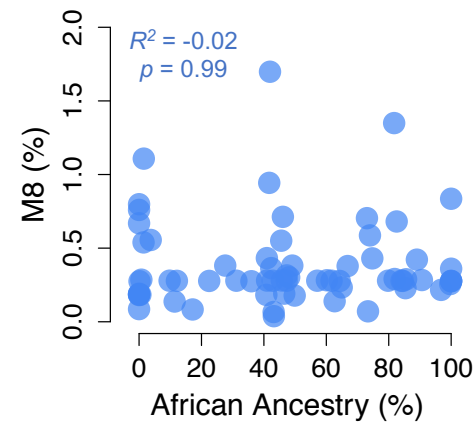

Supplement: supp [file elife-69808-supp-v1.zip]

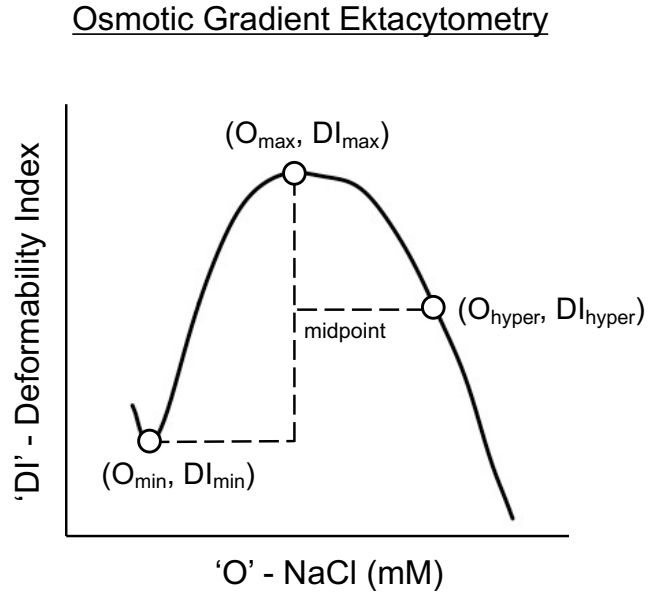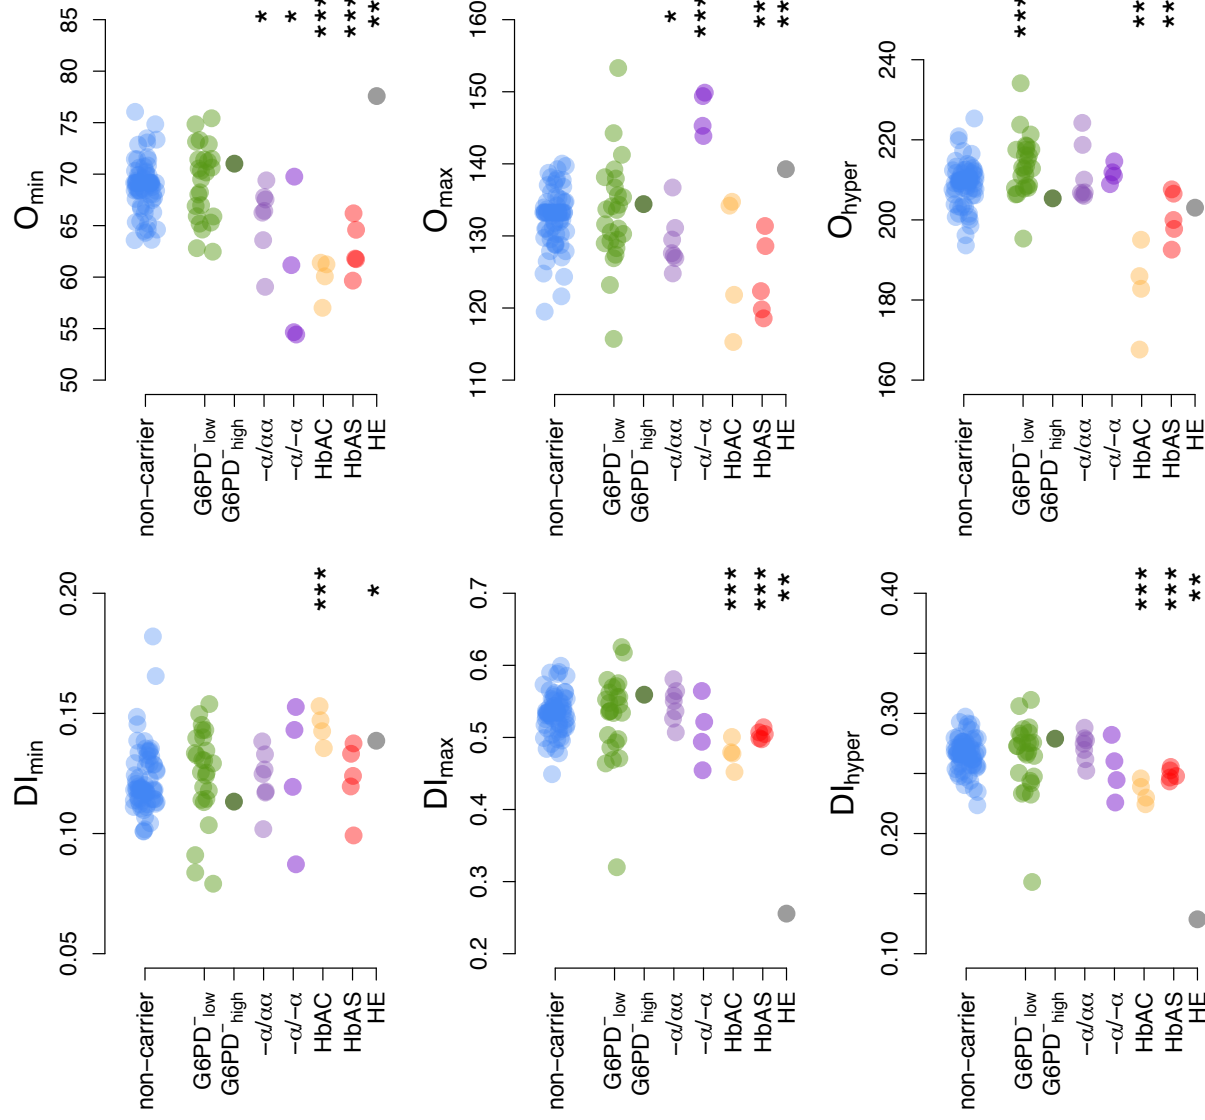

Supplement: supp [file elife-69808-supp-v1.zip]

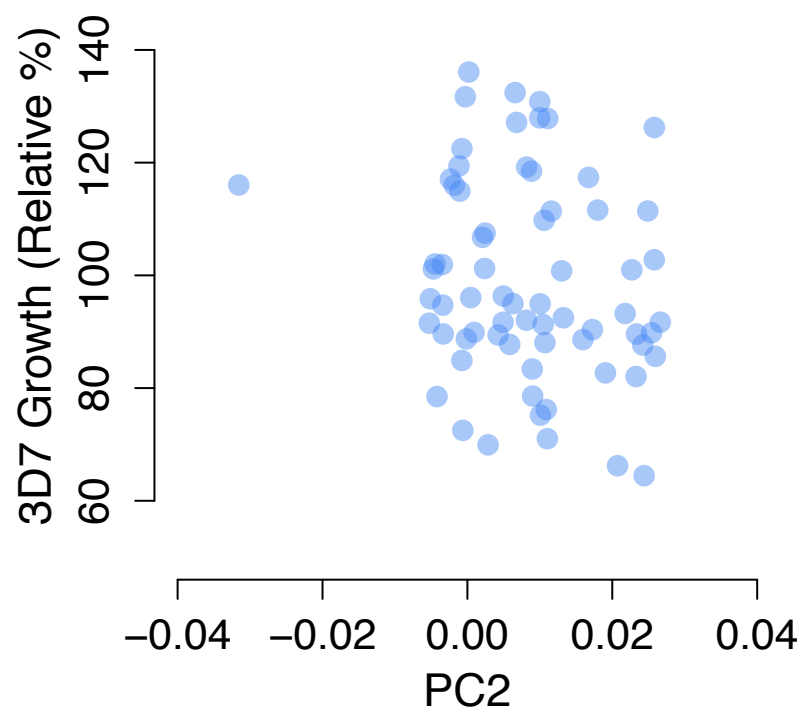

Supplement: supp [file elife-69808-supp-v1.zip]

**A**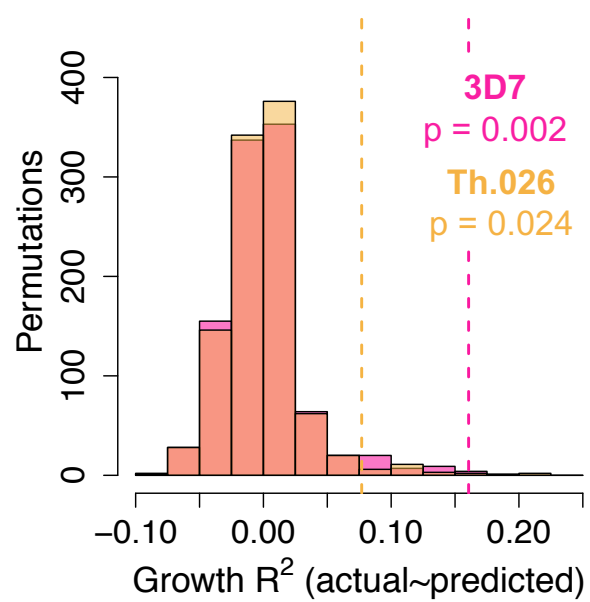**B**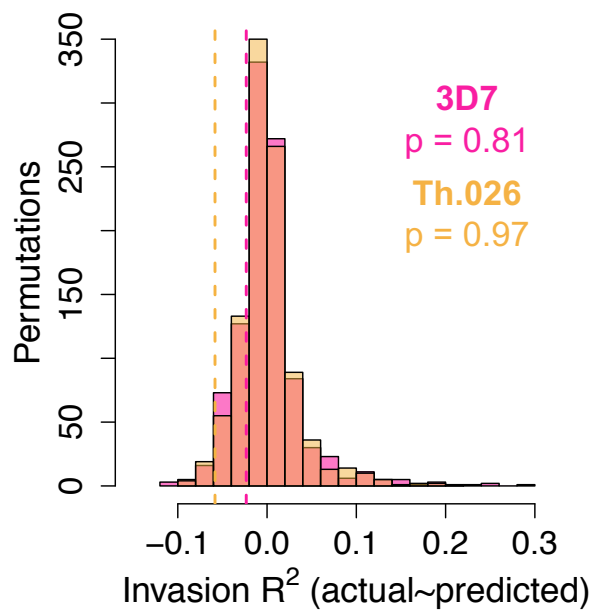

Supplement: supp [file elife-69808-supp-v1.zip]

## Osmotic Fragility (OF)

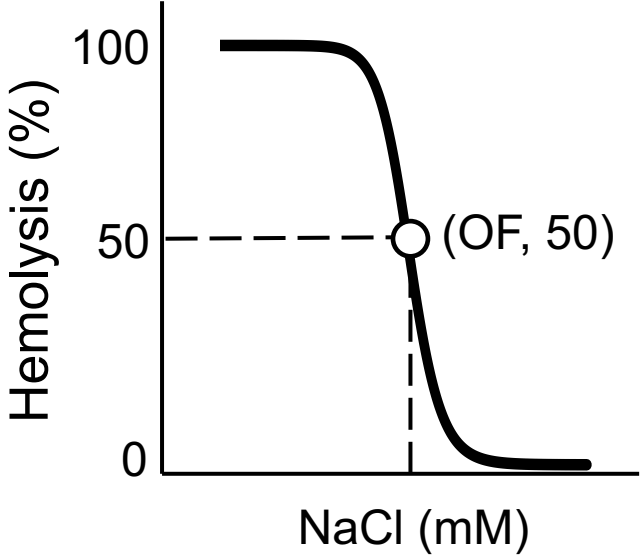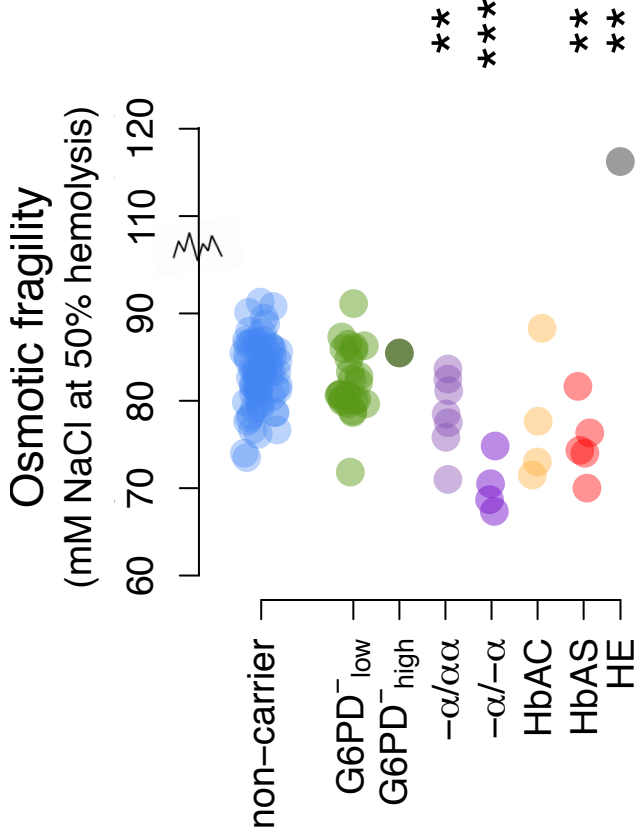

Supplement: supp [file elife-69808-supp-v1.zip]

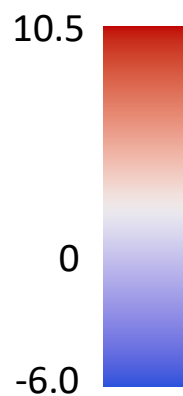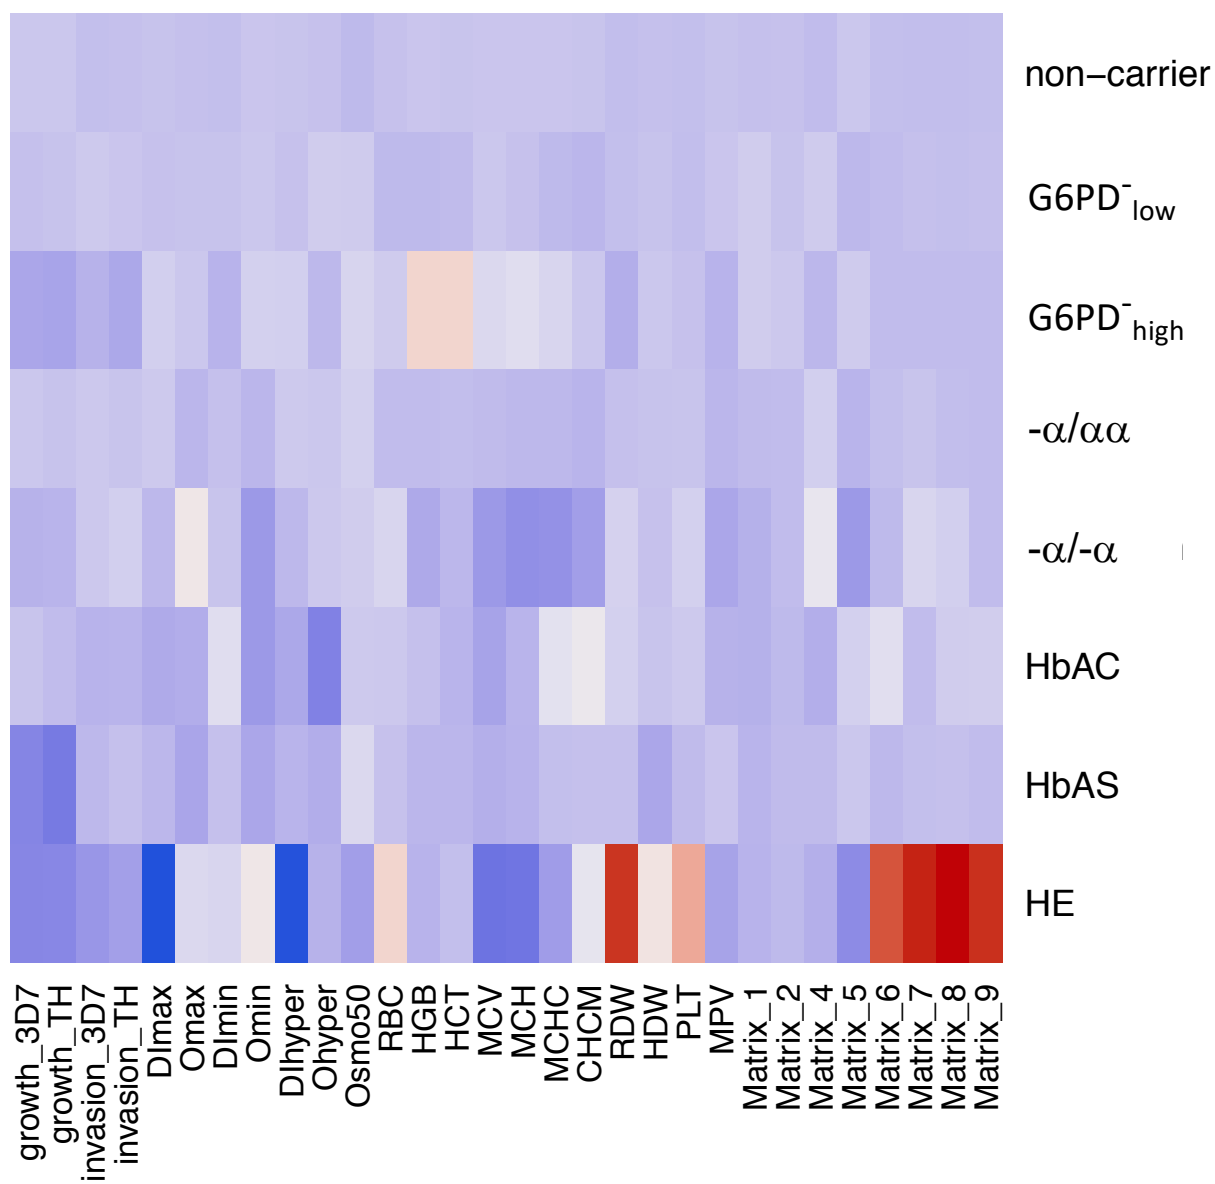

Supplement: supp [file elife-69808-supp-v1.zip]

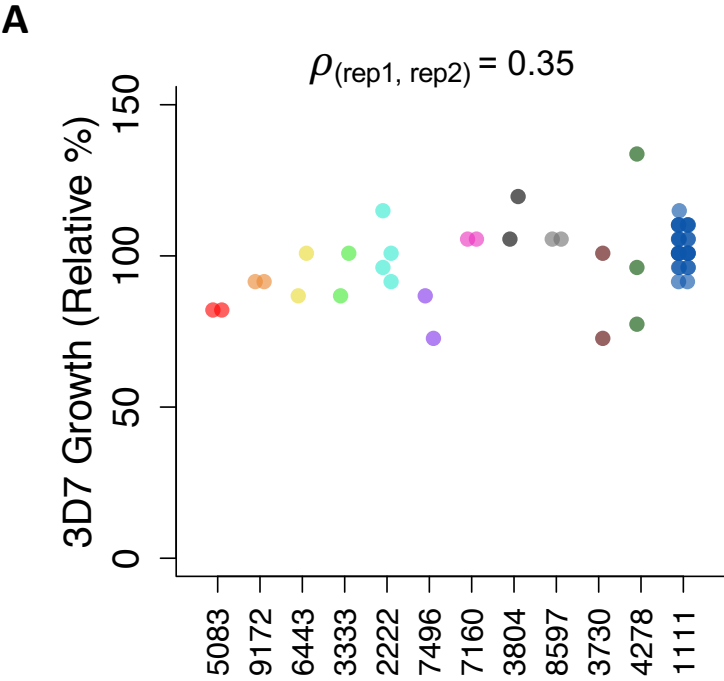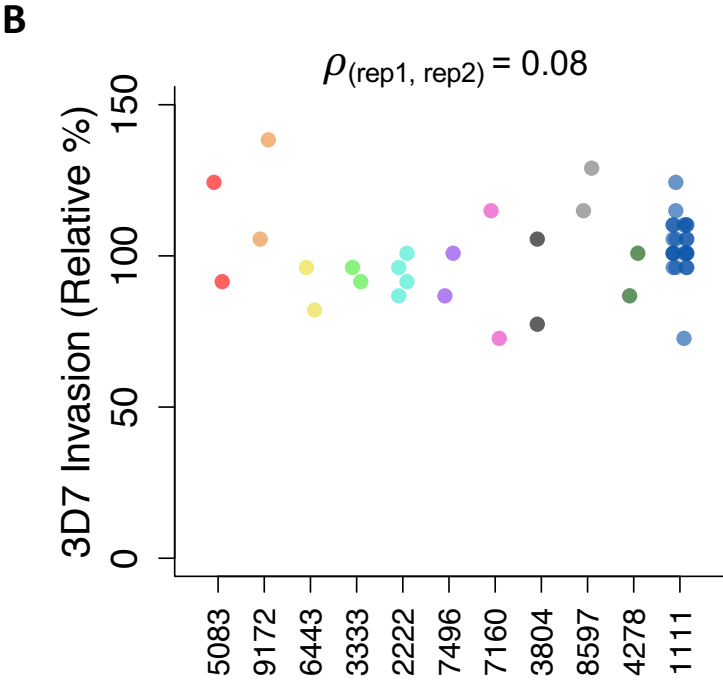

Supplement: supp [file elife-69808-supp-v1.zip]

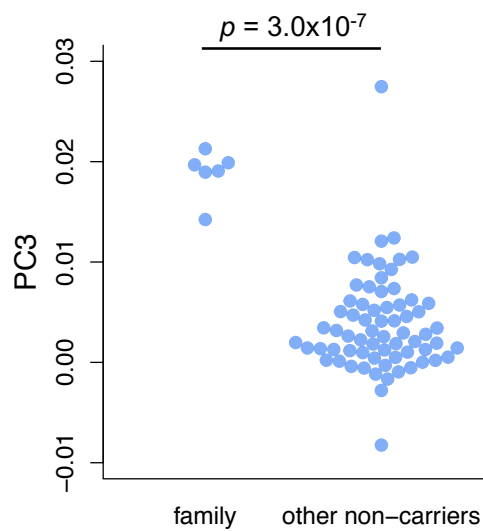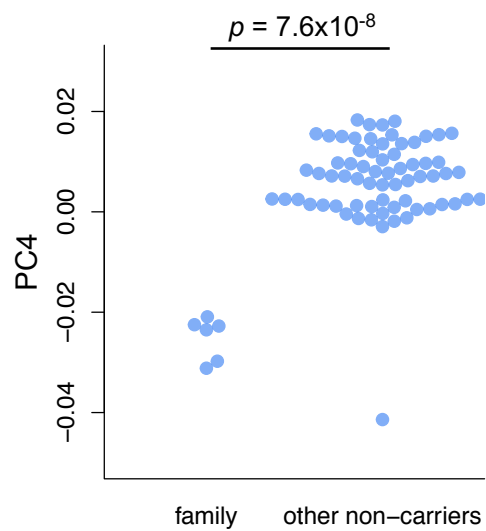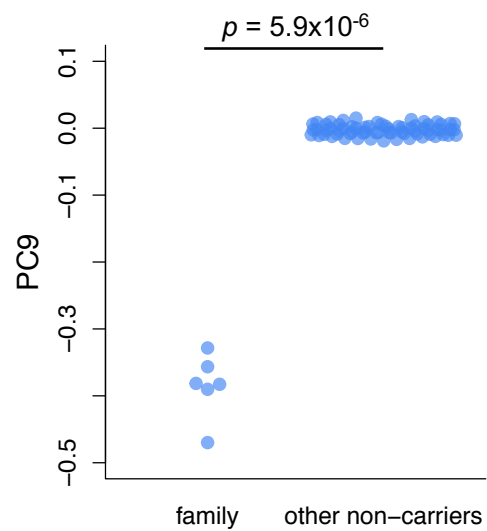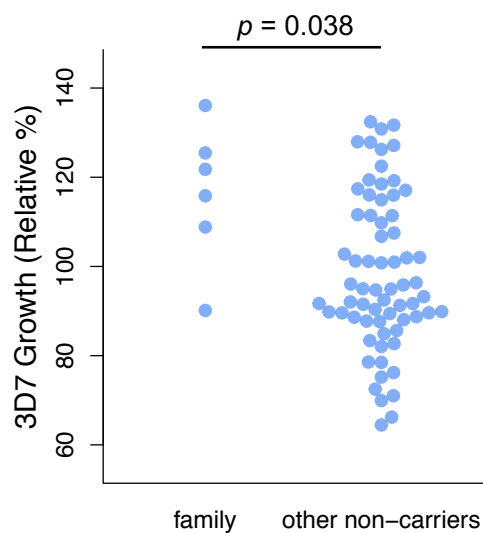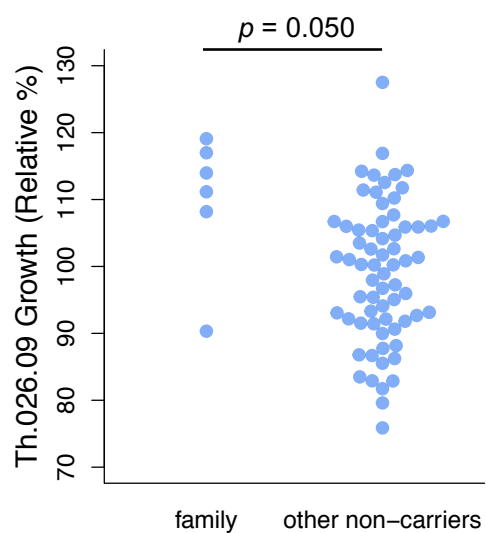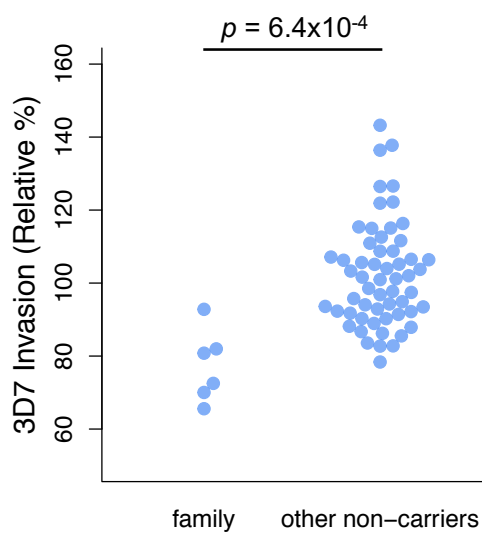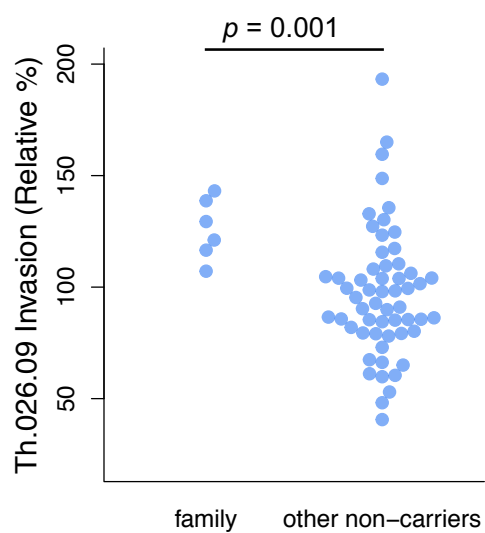

Supplement: supp [file elife-69808-supp-v1.zip]

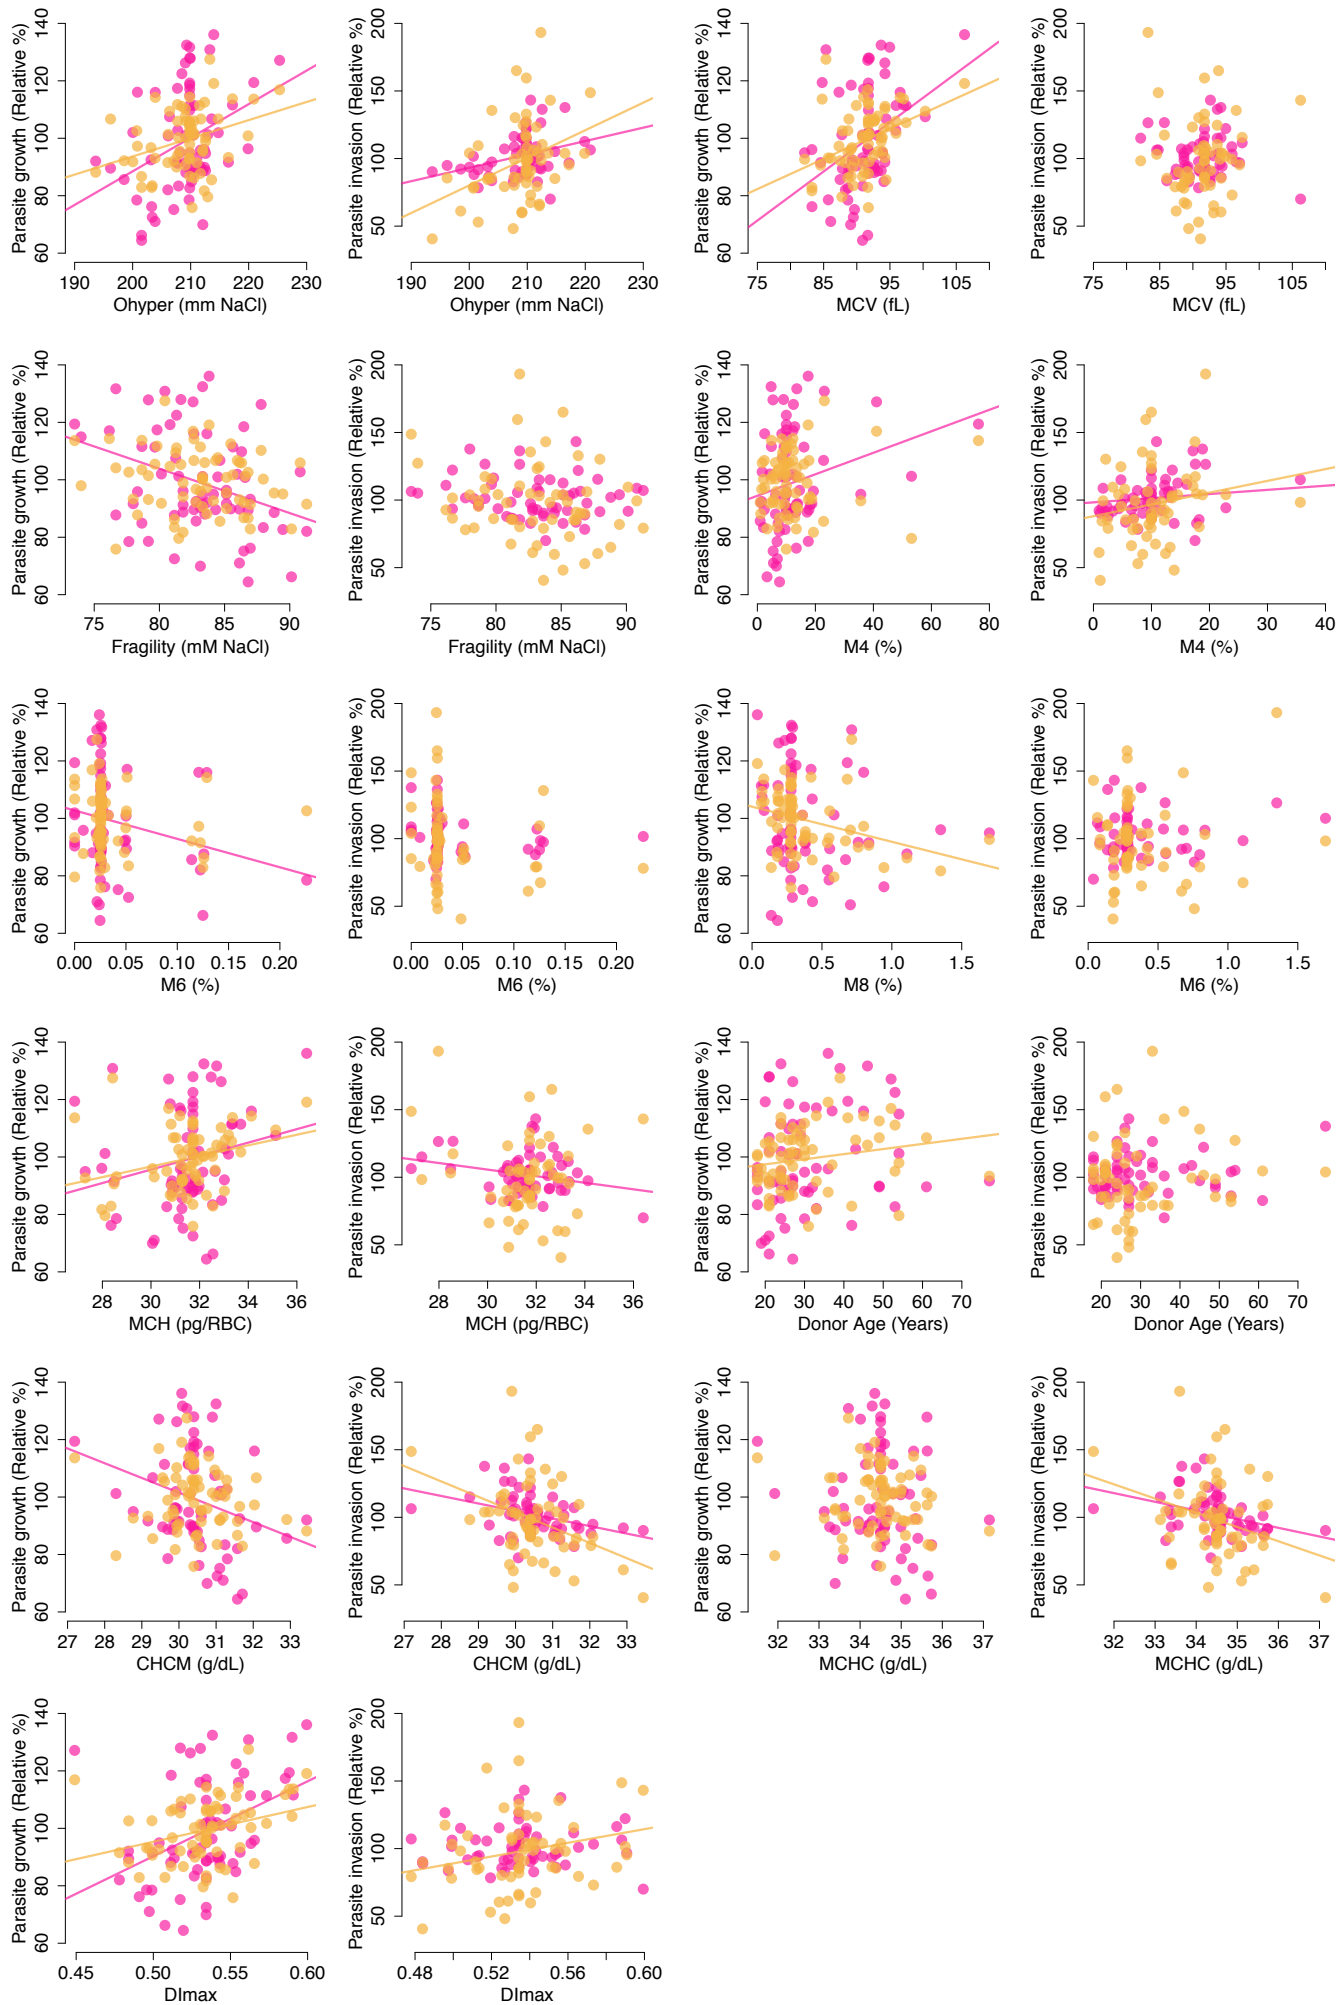

Supplement: supp [file elife-69808-supp-v1.zip]

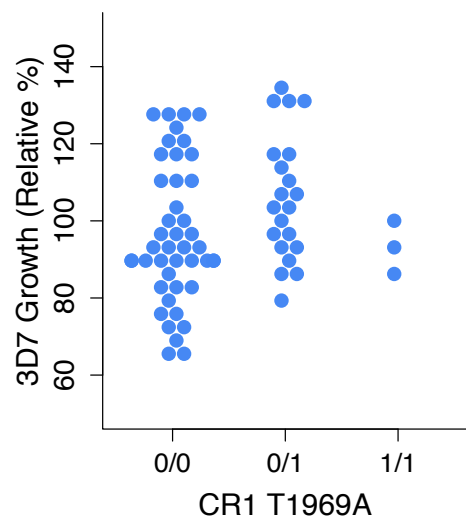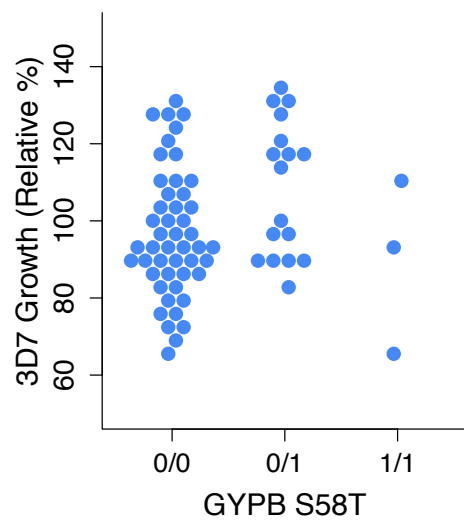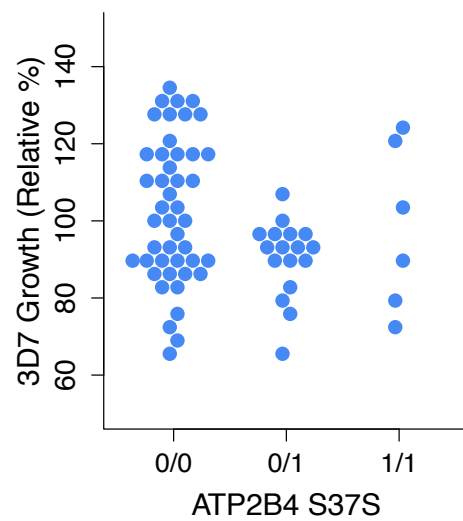

Supplement: supp [file elife-69808-supp-v1.zip]
